# Supplementary material
Source: ML conference proceedings conference paper supplement (https://proceedings.neurips.cc/paper_files/paper/2021/hash/6d96718a701f5bfba283bbdc71dfa5c4-Abstract.html)
Supplement: Supplementary file 1 [file 6d96718a701f5bfba283bbdc71dfa5c4-Supplemental.pdf]

## A Checklist

1. For all authors...
  - (a) Do the main claims made in the abstract and introduction accurately reflect the paper’s contributions and scope? [Yes]
  - (b) Did you describe the limitations of your work? [Yes] See Section 4.1
  - (c) Did you discuss any potential negative societal impacts of your work? [No] This paper describes techniques that alleviate an existing flaw in applying privacy-preserving methods, which would improve their security in practice. Although there are potential negative impacts of privacy-preserving analysis, such as with fairness and the ability to study small populations, our paper does not exacerbate any already existing issues.
  - (d) Have you read the ethics review guidelines and ensured that your paper conforms to them? [Yes]
2. If you are including theoretical results...
  - (a) Did you state the full set of assumptions of all theoretical results? [Yes] See Assumption 3 and the setup for Theorem 2 and Corollary 1.
  - (b) Did you include complete proofs of all theoretical results? [Yes] Sketches are in main document; complete proofs are in supplement.
3. If you ran experiments...
  - (a) Did you include the code, data, and instructions needed to reproduce the main experimental results (either in the supplemental material or as a URL)? [Yes] Code is in the supplement.
  - (b) Did you specify all the training details (e.g., data splits, hyperparameters, how they were chosen)? [Yes] Code is in the supplement.
  - (c) Did you report error bars (e.g., with respect to the random seed after running experiments multiple times)? [No] Figures 2 and 3 are simulations where the goal is precisely to characterize the marginal distributions of interest.
  - (d) Did you include the total amount of compute and the type of resources used (e.g., type of GPUs, internal cluster, or cloud provider)? [No] Figures 2 and 3 are primarily for illustrative purposes, and generating the figures does not require external computing resources.
4. If you are using existing assets (e.g., code, data, models) or curating/releasing new assets...
  - (a) If your work uses existing assets, did you cite the creators? [Yes] Cited R and ggplot2
  - (b) Did you mention the license of the assets? [Yes] All assets are under GNU GPL v3
  - (c) Did you include any new assets either in the supplemental material or as a URL? [Yes] Code for the figures is in the supplement.
  - (d) Did you discuss whether and how consent was obtained from people whose data you’re using/curating? [N/A]
  - (e) Did you discuss whether the data you are using/curating contains personally identifiable information or offensive content? [N/A]
5. If you used crowdsourcing or conducted research with human subjects...
  - (a) Did you include the full text of instructions given to participants and screenshots, if applicable? [N/A]
  - (b) Did you describe any potential participant risks, with links to Institutional Review Board (IRB) approvals, if applicable? [N/A]
  - (c) Did you include the estimated hourly wage paid to participants and the total amount spent on participant compensation? [N/A]

## B Proofs

### B.1 Proof of Theorem 2

First note that if there are multiple  $a \in \mathcal{Y}$  for which  $L_X(a) = 0$ , we can sample  $a \sim \text{Unif}(\{a \in \mathcal{Y} \mid L_X(a) = 0\})$ . Note that if  $\mu_X(\{a \in \mathcal{Y} \mid L_X(a) = 0\}) > 0$ , then we can directly apply the main

result from [15]. Therefore we instead focus on the case where  $\mu_X(\{a \in \mathcal{Y} \mid L_X(a) = 0\}) = 0$  in agreement with our assumption.

Next, the Metropolis-Hastings transition kernel is defined by:

$$\begin{aligned} \tilde{\Pi}_X(y, A) &= \int_A \tilde{q}_X(y, y') \min \left\{ 1, \frac{\tilde{f}_X(y')}{\tilde{f}_X(y)} \right\} d\tilde{\nu}(y') + \\ &\quad \mathbb{1}_{\{y \in A\}} \left[ 1 - \int_{\mathcal{Y}} \tilde{q}_X(y, y') \min \left\{ 1, \frac{\tilde{f}_X(y')}{\tilde{f}_X(y)} \right\} d\tilde{\nu}(y') \right], \end{aligned}$$

Where:

$$\tilde{q}_X(y, y') \min \left\{ 1, \frac{\tilde{f}_X(y')}{\tilde{f}_X(y)} \right\} = \frac{1}{2} [\mathbb{1}_{\{y'=a\}} + q_X(y, y')] \min \left\{ 1, \frac{(1-k)f_X(y') + k\mathbb{1}_{\{y'=a\}}}{(1-k)f_X(y) + k\mathbb{1}_{\{y=a\}}} \right\}$$

The density  $\tilde{f}_X$  is maximized at  $a$  by construction; note that this does not depend on the uniqueness of  $a$ . This implies:

$$\begin{aligned} \tilde{\Pi}_X(y, \{a\}) &\geq \int_{\{a\}} \tilde{q}_X(y, y') \min \left\{ 1, \frac{(1-k)f_X(y') + k}{(1-k)f_X(y) + k\mathbb{1}_{\{y=a\}}} \right\} d\tilde{\nu}(y') \\ &\geq \frac{k}{2} \triangleq \eta > 0 \end{aligned}$$

Therefore the first condition is met, and we can use Algorithm 1 to perform perfect sampling. Let  $N_{\text{Outer}} \sim \text{Geometric}(\eta_1)$  be the length of this outer loop.

Next, we need to characterize  $N_{\text{Bern}}$ , the number of Bernoulli factory flips necessary to sample from the Bernoulli distribution in Algorithm 1. Using the proposed algorithm in [14] and the minorization term above:

$$\mathbb{E}[N_{\text{Bern}}] \leq \frac{12}{\eta} = \frac{24}{k}$$

Next, we need to calculate, in the worst possible case, how many inner loop samples  $N_{\text{Inner}}$  are necessary to sample from the remainder in Algorithm 1:

$$\begin{aligned} \tilde{\Pi}_X(y, \mathcal{Y} \setminus \{a\}) &= \int_{\mathcal{Y} \setminus \{a\}} \tilde{q}_X(y, y') \min \left\{ 1, \frac{\tilde{f}_X(y')}{\tilde{f}_X(y)} \right\} d\tilde{\nu}(y') + \\ &\quad \mathbb{1}_{\{y \in \mathcal{Y} \setminus \{a\}\}} \left[ 1 - \int_{\mathcal{Y}} \tilde{q}_X(y, y') \min \left\{ 1, \frac{\tilde{f}_X(y')}{\tilde{f}_X(y)} \right\} d\tilde{\nu}(y') \right] \\ &\geq (1-k) \int_{\mathcal{Y}} q_X(y, y') \min \left\{ 1, \frac{f_X(y')}{f_X(y)} \right\} d\nu(y') \end{aligned}$$

Define:

$$p_{\text{Accept}}(y) \triangleq \int_{\mathcal{Y}} q_X(y, y') \min \left\{ 1, \frac{f_X(y')}{f_X(y)} \right\} d\nu(y')$$

Then:

$$\Pi_X(y, \mathcal{Y} \setminus \{a\}) \geq (1-k) \inf_{y \in \mathcal{Y}} p_{\text{Accept}}(y)$$

Finally, let  $N_{\text{Nonatomic}}$  be the number of runs of Algorithm 1 to yield a perfect sample from the unmodified target distribution 2. Then  $N_{\text{Nonatomic}} \sim \text{Geometric}(1-k)$ . Combining all the results, the total number of proposed samples of all kinds  $N_{\text{Total}}$  is bounded above by:

$$\mathbb{E}[N_{\text{Total}}] \leq \mathbb{E}[N_{\text{Outer}}] \mathbb{E}[N_{\text{Bern}}] \mathbb{E}[N_{\text{Inner}}] \mathbb{E}[N_{\text{Nonatomic}}] \leq \frac{48}{k^2(1-k)^2 \inf_{y \in \mathcal{Y}} p_{\text{Accept}}(y)}$$

## B.2 Proof of Corollary 1

The expected runtime bound follows immediately from the proof of Theorem 2 above. For the utility, recall that for the original exponential mechanism [17, Lemma 7]:

$$\mu_X(S_\varepsilon) \leq \frac{1}{\nu(S_{\varepsilon/2})} \exp\left(-\frac{\varepsilon\varepsilon}{4\Delta_L}\right)$$

For the mechanism as implemented over the discrete atoms  $\{y^{(l)}\}_{l=1}^\ell$ , [8, Corollary 3.12] show that:

$$\mathbb{P}\left(\|L_X(Y)\| \geq \varepsilon \mid Y \in \{y^{(l)}\}_{l=1}^\ell\right) \leq \exp\left(-\frac{\varepsilon}{2\Delta_L}\left(\varepsilon - \frac{2\Delta_L}{\varepsilon} \log(\ell)\right)\right)$$

The utility result follows immediately from conditioning on the two mixture components.

## B.3 Proof of Corollary 2

Using the same notation from the proof of the main theorem, the only modification necessary so that  $N_{\text{prop}}$  is 0-DP is that the data-dependent component,  $N_{\text{inner}}$  have a distribution independent of  $X$ . Using [3] Lemma 17, we can add geometric random noise to  $N_{\text{inner}}$  for any iteration of the inner loop with probability depending on  $X$ . In particular, we assume an adversary knows a modified  $\tilde{N}_{\text{inner}}$  where:

$$\tilde{N}_{\text{inner}} \triangleq N_{\text{inner}}Z + (1-Z)(N_{\text{inner}} + N_{\text{wait}})$$

where:

$$Z \sim \text{Bernoulli}\left(\frac{\inf_{X \in \mathcal{X}^n} \inf_{y \in \mathcal{Y}} p_{\text{Accept}}(y)}{\inf_{y \in \mathcal{Y}} p_{\text{Accept}}(y)}\right), \quad N_{\text{wait}} \sim \text{Geometric}\left(\inf_{X \in \mathcal{X}^n} \inf_{y \in \mathcal{Y}} p_{\text{Accept}}(y)\right)$$

Then:

$$\mathbb{E}\left[\tilde{N}_{\text{inner}}\right] \leq \frac{2}{(1-k) \inf_{X \in \mathcal{X}^n} \inf_{y \in \mathcal{Y}} p_{\text{Accept}}(y)}$$

The corollary result then follows from replacing  $\mathbb{E}[N_{\text{inner}}]$  with  $\mathbb{E}[\tilde{N}_{\text{inner}}]$  in the the proof for Theorem 2.

## B.4 Derivation for Example 1

$$f_X(y) = C_X \mathbb{1}_{\{y \in [0,1]^d\}} \exp\left(-\frac{\varepsilon n}{2d} \|y - \bar{X}\|_1\right)$$

With integration constant:

$$C_X^{-1} \triangleq \int_{[0,1]^d} \exp\left(-\frac{\varepsilon n}{2d} \|y - \bar{X}\|_1\right) d\nu(y)$$

Independent uniform proposal MCMC sampler:

$$\begin{aligned} \inf_{X \in \mathcal{X}^n} \inf_{y \in \mathcal{Y}} \frac{q_X(y)}{f_X(y)} &= \left(\sup_{X \in \mathcal{X}^n} \sup_{y \in \mathcal{Y}} f_X(y)\right)^{-1} \\ &= \left(\inf_{X \in \mathcal{X}^n} C_X^{-1}\right)^{-1} \\ &= \prod_{j=1}^d \int_0^1 \exp\left(-\frac{\varepsilon n}{2d} |y_j|\right) dy_j \\ &= \left(\frac{2d}{\varepsilon n} (1 - e^{-\varepsilon n/2d})\right)^d \triangleq \beta_{\text{MCMC,Unif}} \end{aligned}$$

Laplace proposal MCMC sampler; first, let  $Z \sim \text{MVLaplace}(x, \alpha)$  for  $x \in [0, 1]^d$  Then using the previous result:

$$\mathbb{P}(Z \in [0, 1]^d) \geq \left(\frac{1}{\alpha} (1 - e^{-\alpha})\right)^d.$$

Then:

$$\begin{aligned} Q_X(y, y') &\geq Q_X(\bar{X}, y') \\ &\geq (2\alpha)^d \exp\left(-\left(\alpha d + \frac{\epsilon n}{2}\right)\right) \left(\frac{1}{\alpha}(1 - e^{-\alpha})\right)^d \triangleq \beta_{\text{MCMC, Lap}} \end{aligned}$$

Let  $F(\cdot; b)$  be the CDF of the Laplace distribution with scale parameter  $b$ . Independent uniform proposal perfect sampler:

$$\begin{aligned} p_{\text{Accept}}(y) &= \int_{\mathcal{Y}} q_X(y, y') \min\left\{1, \frac{f_X(y')}{f_X(y)}\right\} d\nu(y') \\ &= \int_{[0,1]^d} \min\left\{1, \exp\left(-\frac{\epsilon n}{2d} (\|y' - \bar{X}\|_1 - \|y - \bar{X}\|_1)\right)\right\} d\nu(y') \\ &\geq \int_{[0,1]^d} \exp\left(-\frac{\epsilon n}{2d} (\|y' - \bar{X}\|_1)\right) d\nu(y') \\ &= \prod_{j=1}^d \int_0^1 \exp\left(-\frac{\epsilon n}{2d} |y'_j - \bar{X}_j|\right) dy'_j \\ &= \prod_{j=1}^d \frac{\epsilon n}{4d} \left(F\left(1 - \bar{X}_j; \frac{\epsilon n}{2d}\right) - F\left(-\bar{X}_j; \frac{\epsilon n}{2d}\right)\right) \end{aligned}$$

Laplace proposal perfect sampler:

$$\begin{aligned} p_{\text{Accept}}(y) &= \int_{\mathcal{Y}} q_X(y, y') \min\left\{1, \frac{f_X(y')}{f_X(y)}\right\} d\nu(y') \\ &= \int_{[0,1]^d} (2\alpha)^d \exp(-\alpha \|y - y'\|_1) \min\left\{1, \exp\left(-\frac{\epsilon n}{2d} (\|y' - \bar{X}\|_1 - \|y - \bar{X}\|_1)\right)\right\} d\nu(y') \\ &\geq \int_{[0,1]^d} (2\alpha)^d \exp\left(-\left(\frac{\epsilon n}{2d} + \alpha\right) (\|y' - \bar{X}\|_1)\right) d\nu(y') \\ &= (2\alpha)^d \prod_{j=1}^d \int_0^1 \exp\left(-\left(\frac{\epsilon n}{2d} + \alpha\right) |y'_j - \bar{X}_j|\right) dy'_j \\ &= (2\alpha)^d \prod_{j=1}^d \left(\frac{\epsilon n}{4d} + \frac{\alpha}{2}\right) \left(F\left(1 - \bar{X}_j; \frac{\epsilon n}{2d} + \alpha\right) - F\left(-\bar{X}_j; \frac{\epsilon n}{2d} + \alpha\right)\right) \end{aligned}$$

## B.5 Simulation specification for Example 2

Constants:

$$\begin{cases} n \triangleq 100 \\ p \triangleq 5 \\ \beta \triangleq (.1, .2, -.3, 0, 0)^T \\ \lambda \triangleq 1 \end{cases}$$

Random variables:

$$\begin{cases} X_{ij} \sim \text{Beta}(5, 5) & i \in [n], j \in [p] \\ e_i \sim \text{Beta}(20, 20) & i \in [n] \\ Z_i \triangleq X_{i,\cdot} \beta + (2e_i - 1) & i \in [n] \end{cases}$$
